# Supplementary material for: The conformational and mutational landscape of the ubiquitin-like marker for the autophagosome formation in cancer
Source: bioRxiv or medRxiv preprint supplement (doi:10.1101/635284), 2019-05-14

FF

- a14
- amber99star-ildn
- amber99star-nmr
- charmm27
- rsff1
- amber99sb-disp
- amber99star-ildn-q
- charmm22star
- charmm36
- rsff2

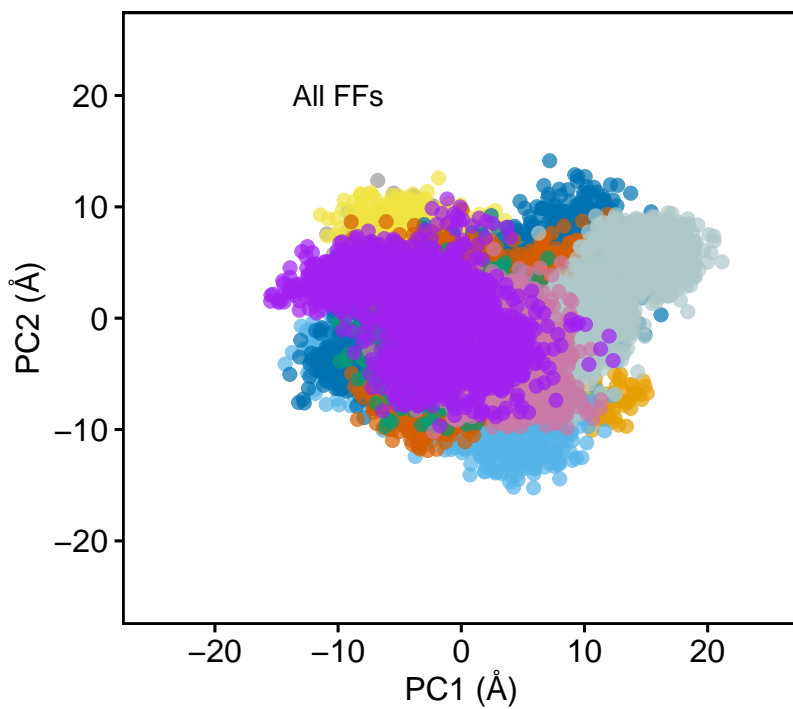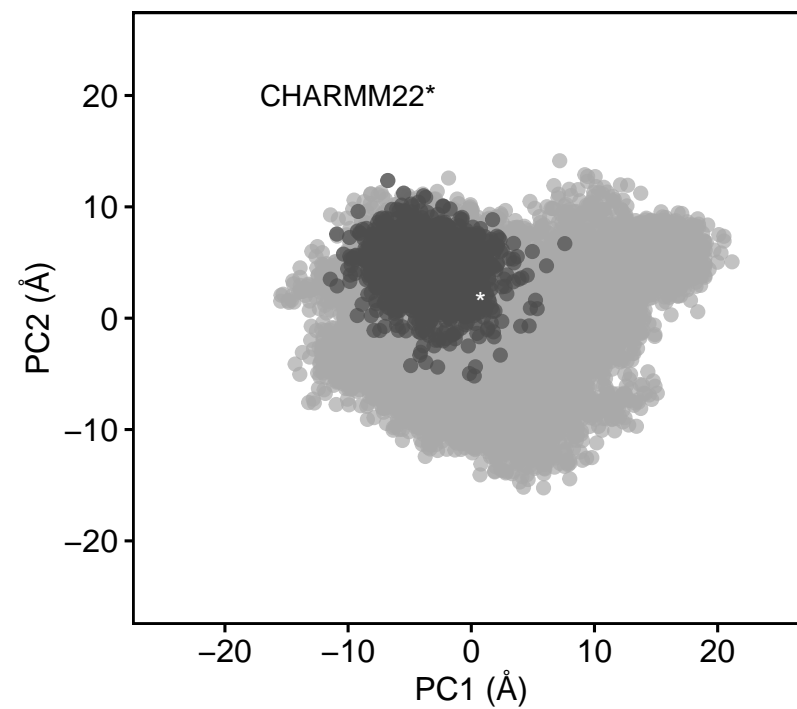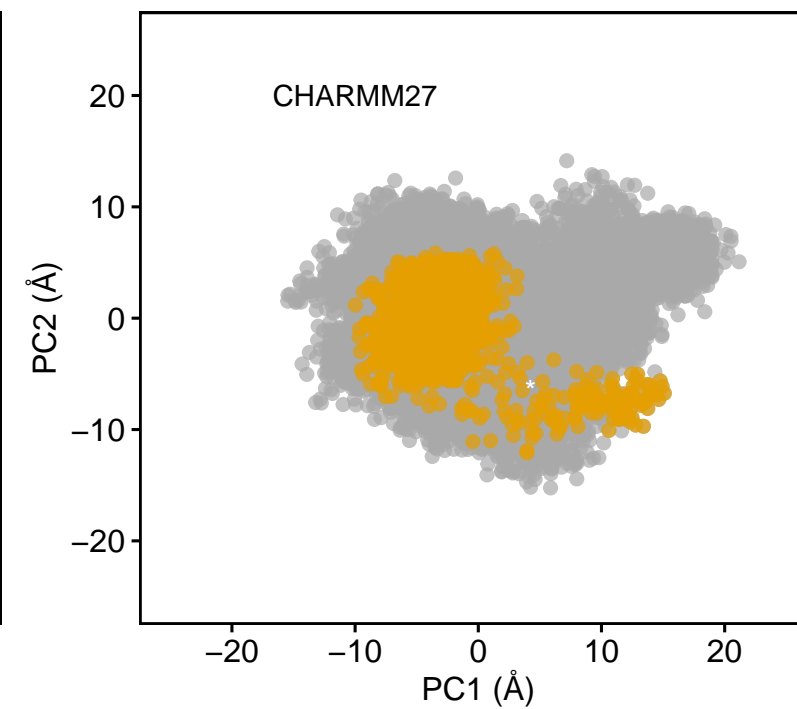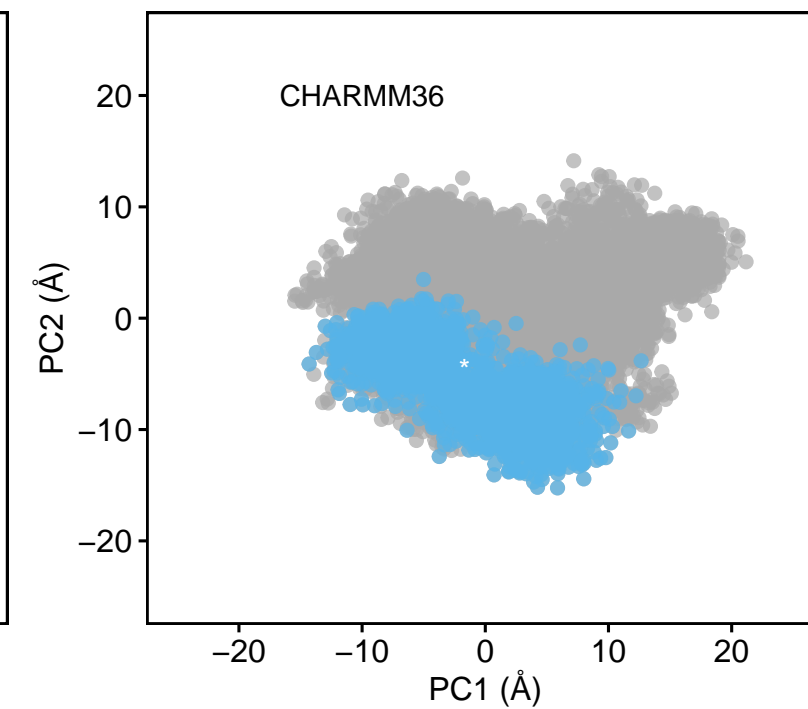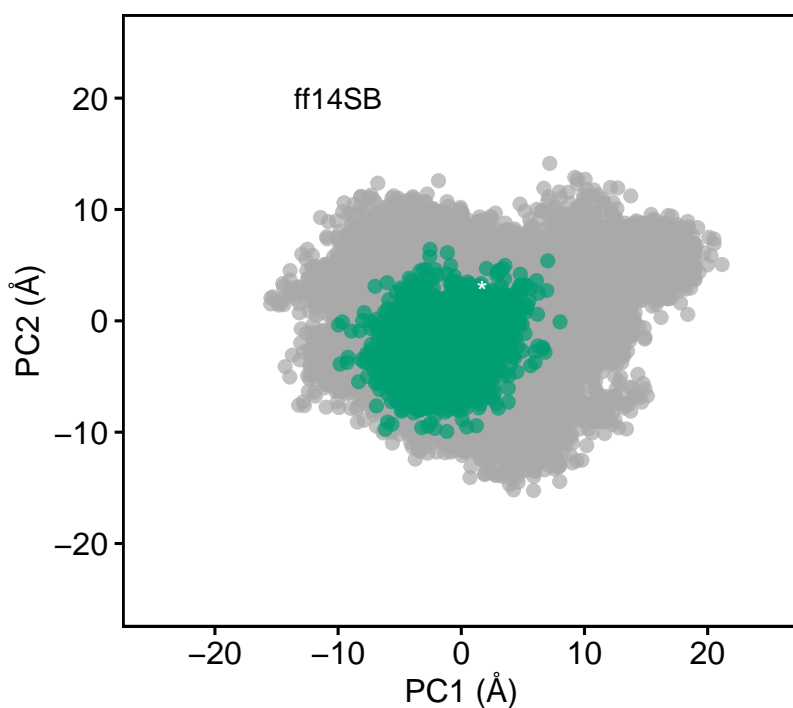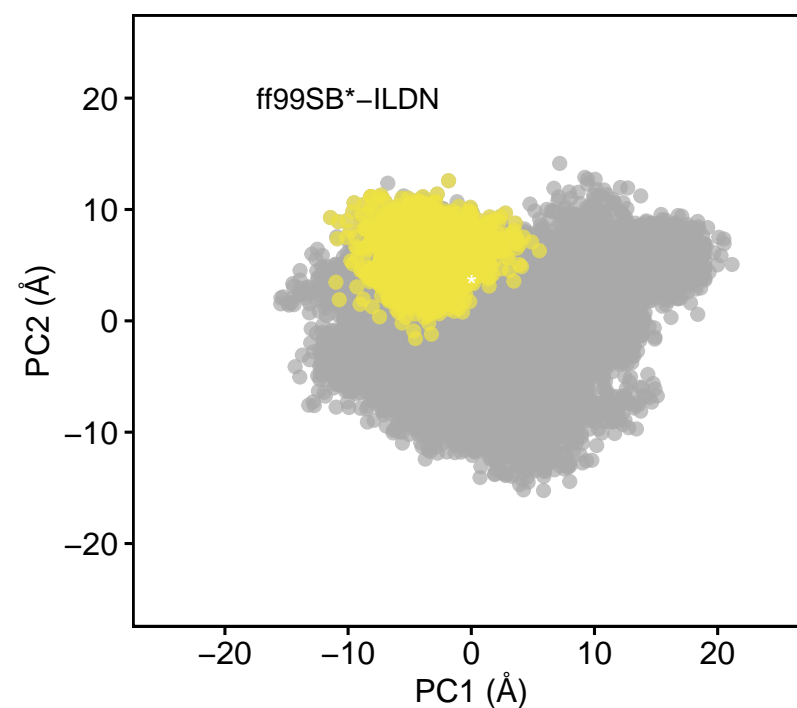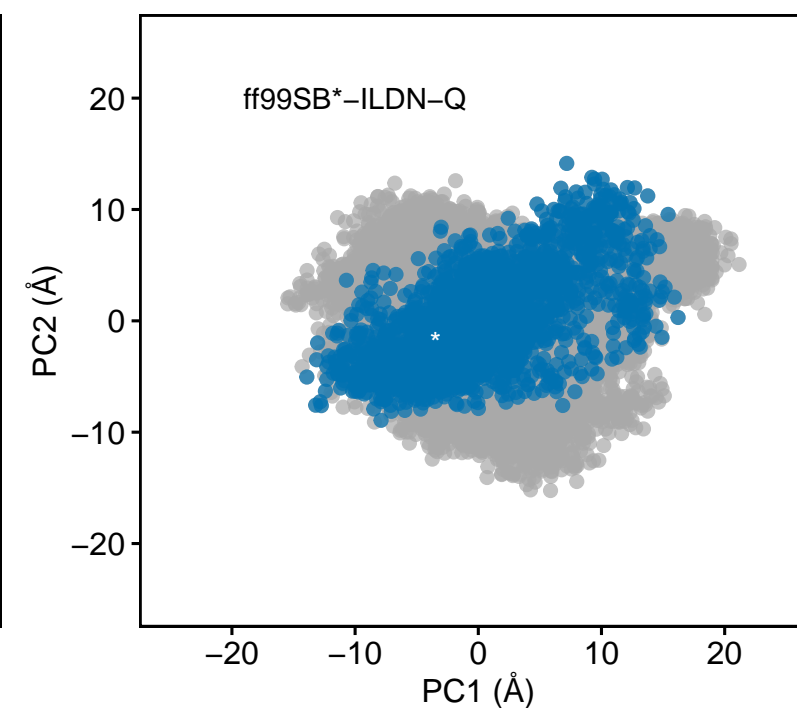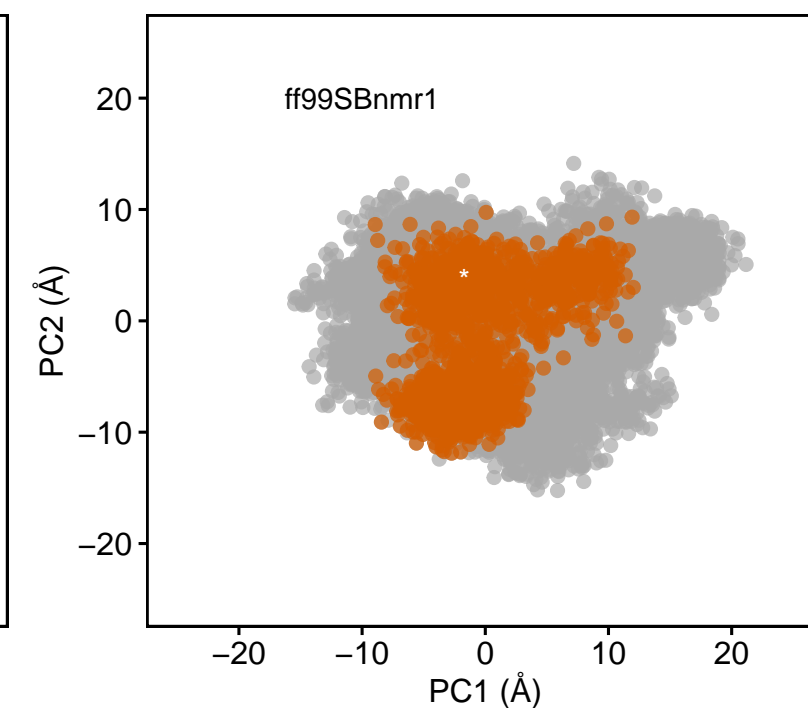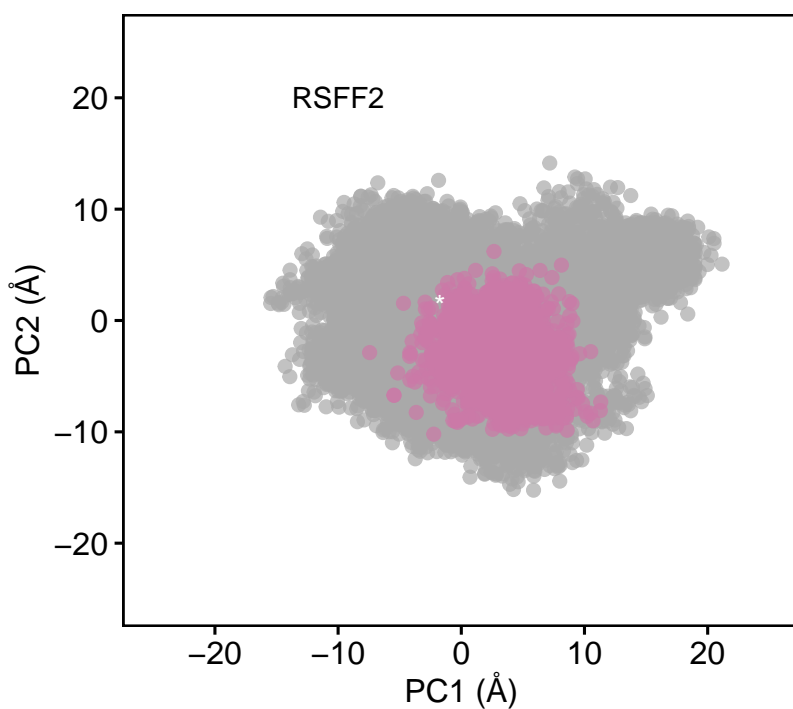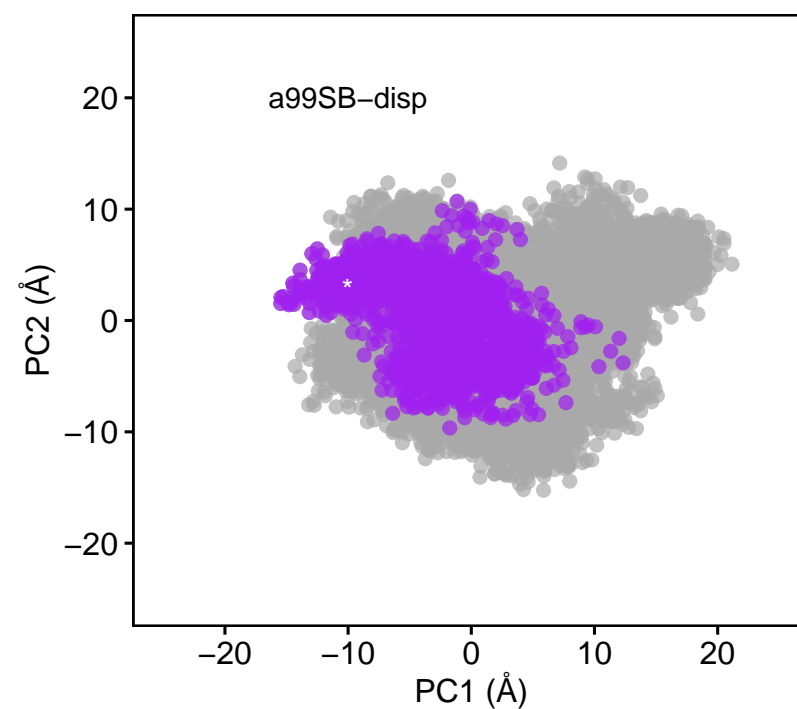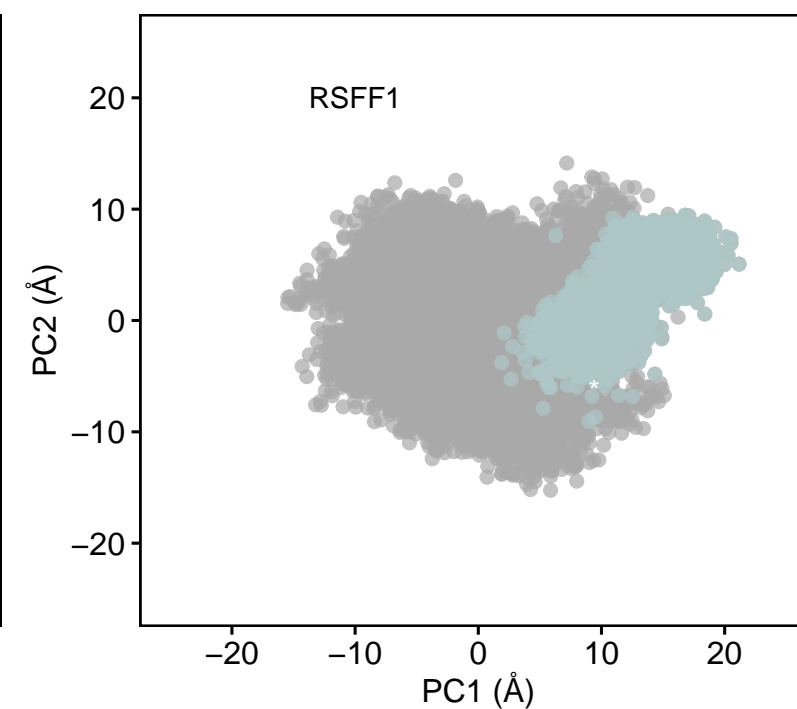

FF

- a14
- amber99star-ildn
- amber99star-nmr
- charmm27
- rsff1
- amber99sb-disp
- amber99star-ildn-q
- charmm22star
- charmm36
- rsff2

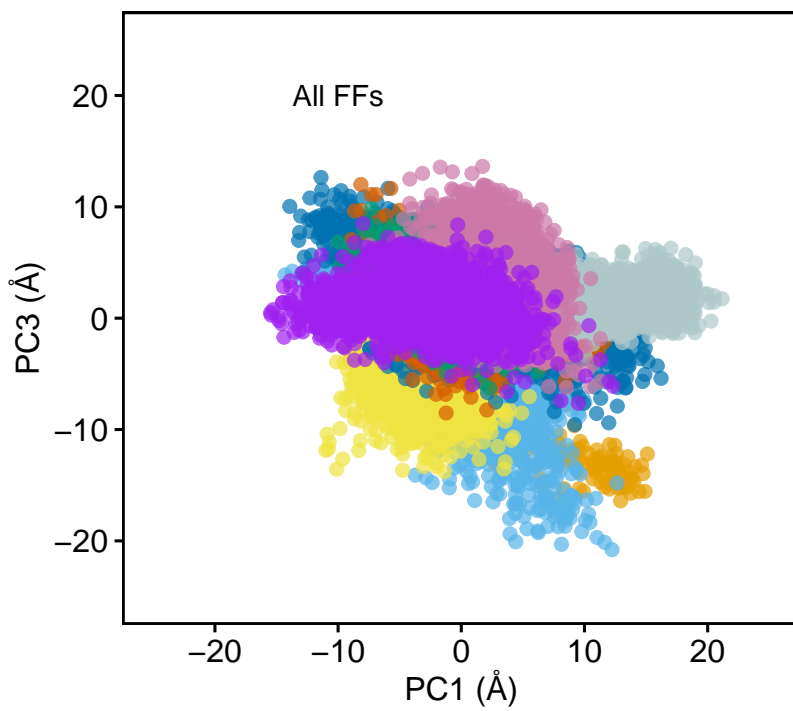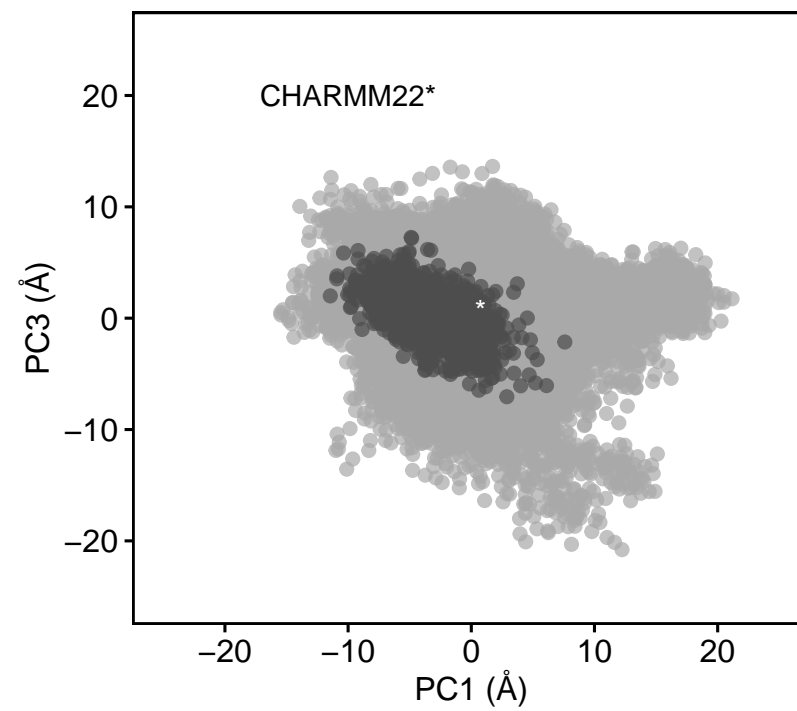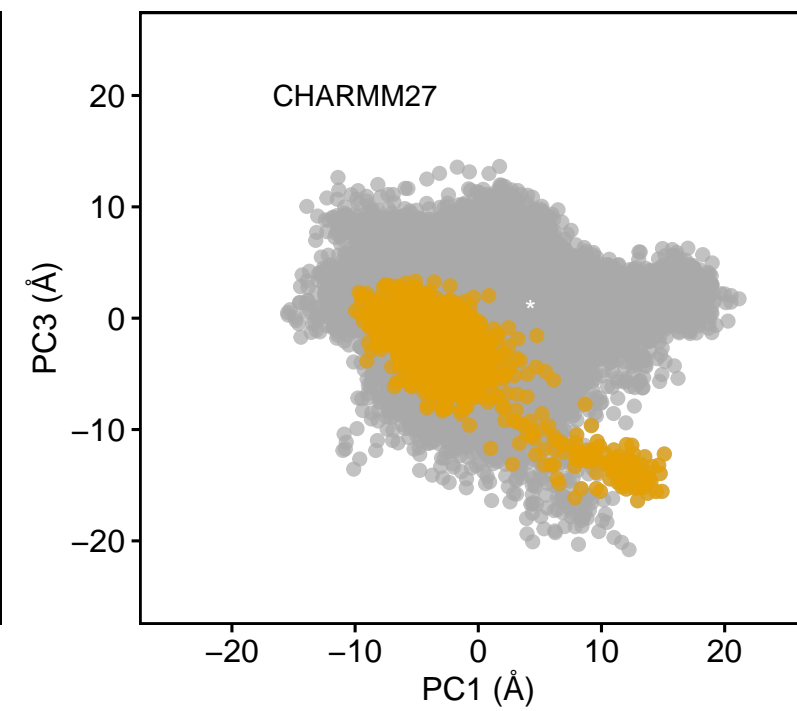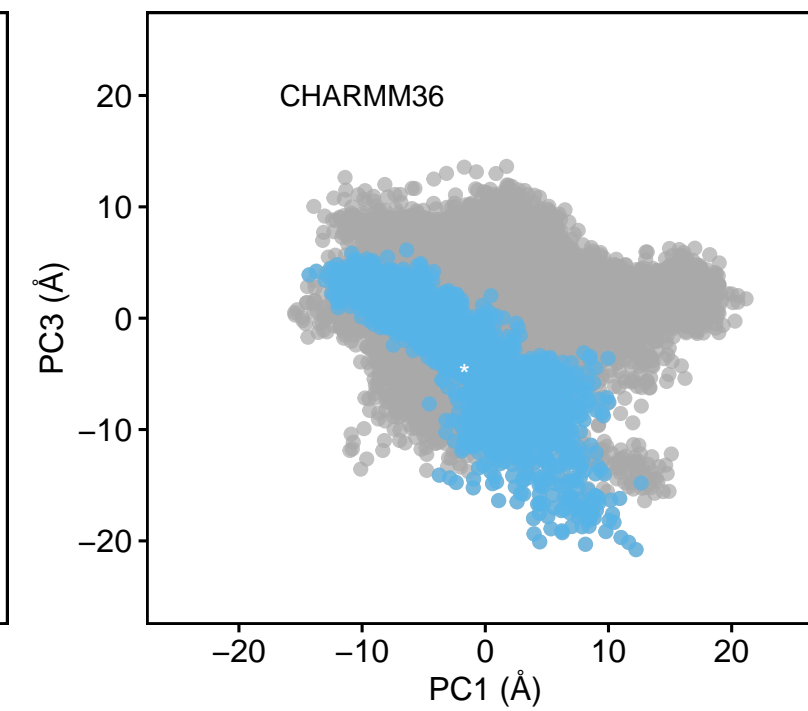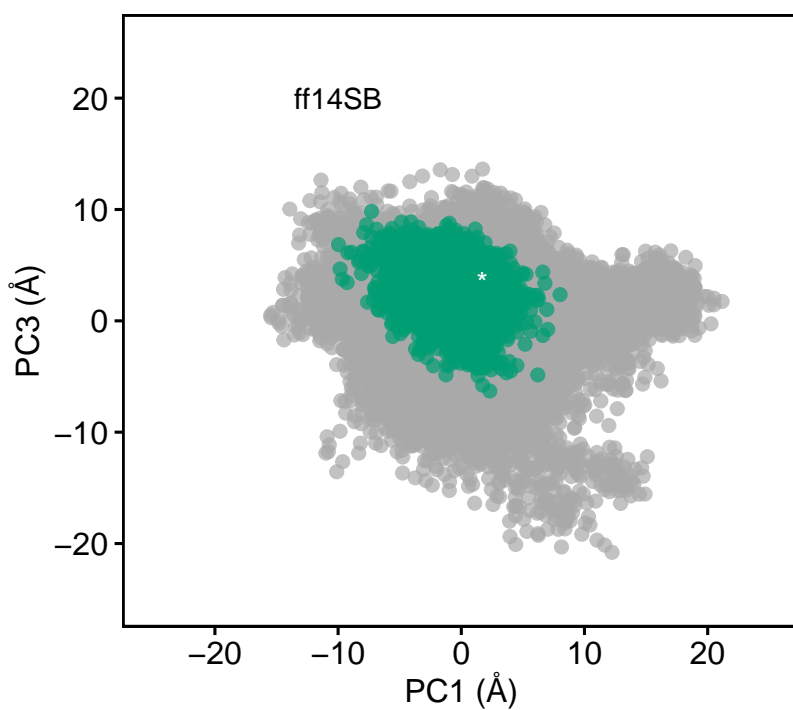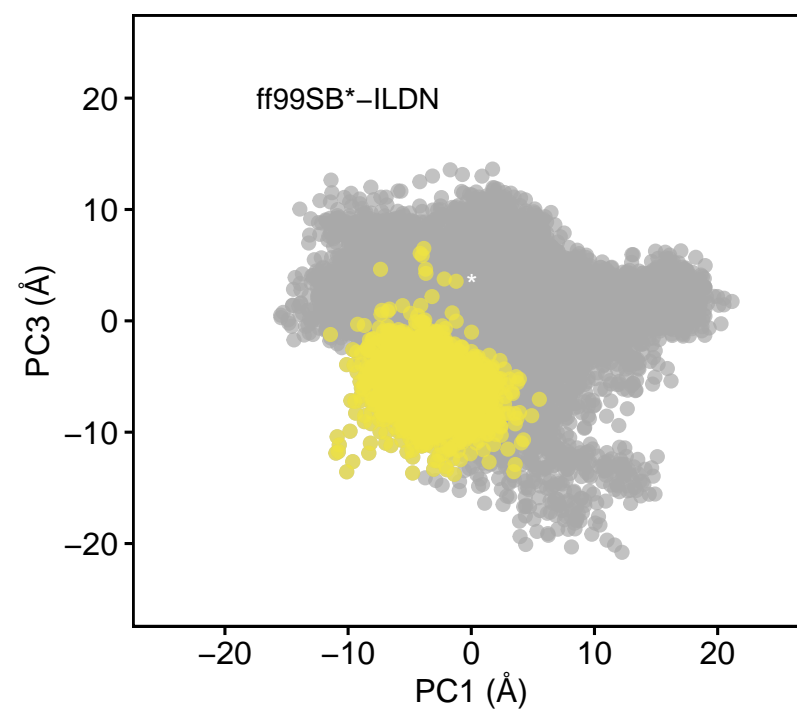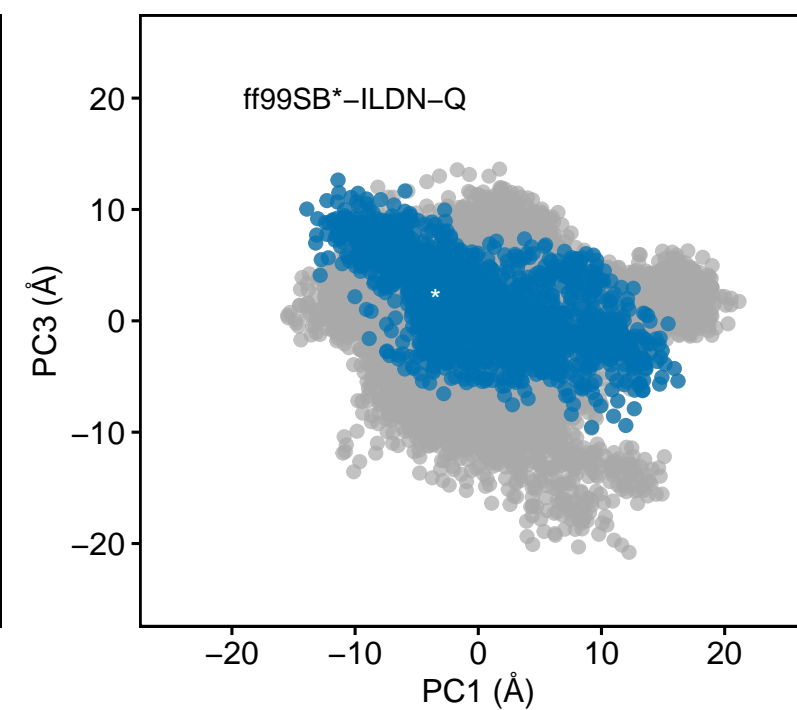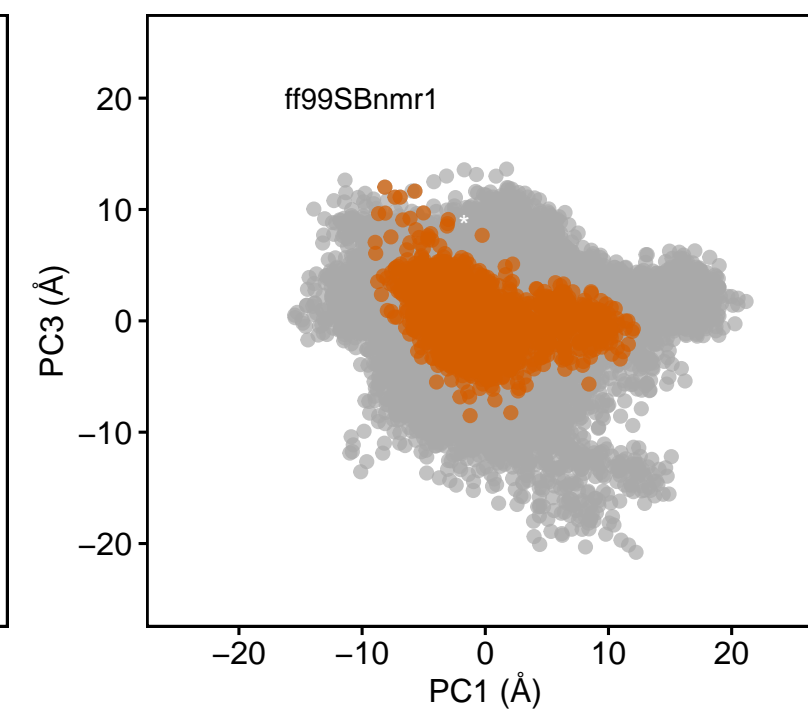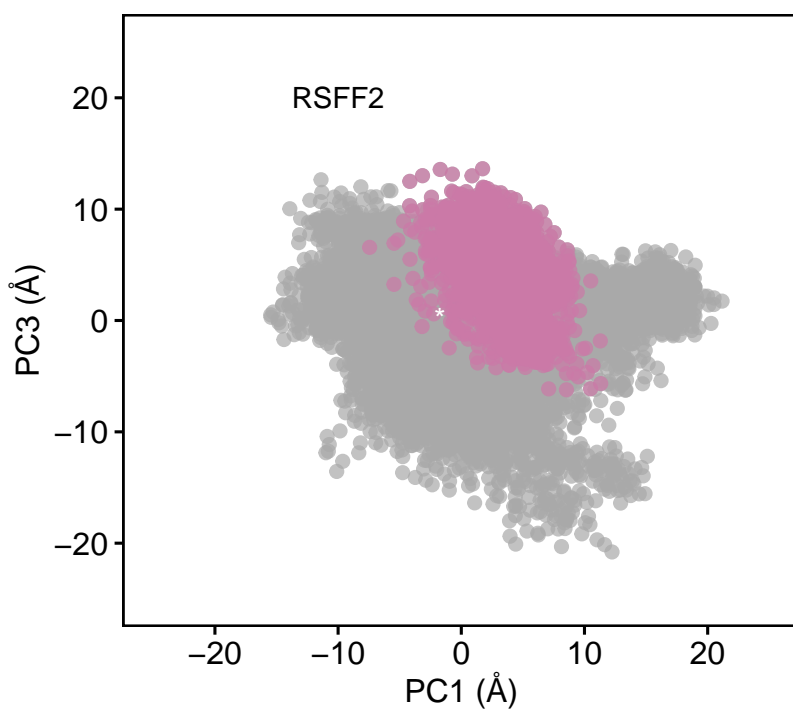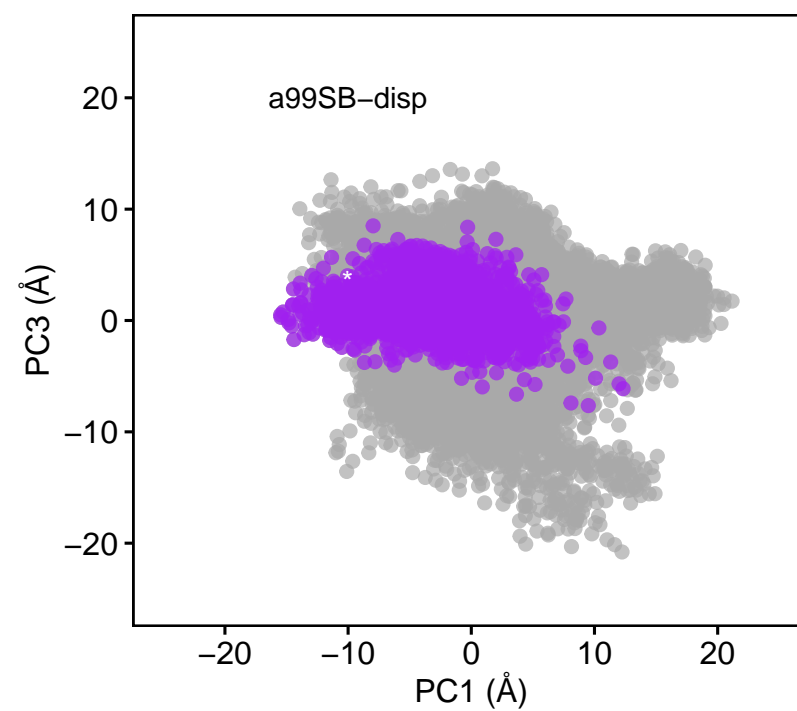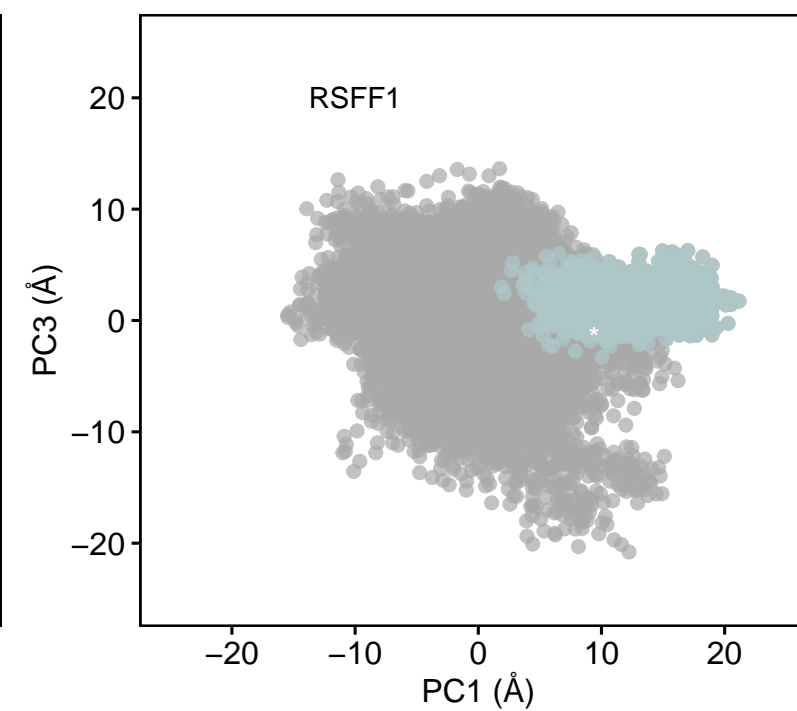

Supplement: Supplementary file [file media-3.pdf]
