# Supplementary material for: The conformational and mutational landscape of the ubiquitin-like marker for the autophagosome formation in cancer
Source: bioRxiv or medRxiv preprint supplement (doi:10.1101/635284), 2019-05-14
Supplement: Supplementary file [file media-9.pdf]

CLUSTAL O(1.2.4) multiple sequence alignment

```
sp|O95166|GBRAP_HUMAN      -----MKFVYKEEHPFEKRRSEGEKIRKKYPDRVPVIVEKAPKA-RIGDLDDKKKYL 51
sp|Q9BXW4|MLP3C_HUMAN      MPPPQKIPSVRPFKQRKSLAIRQEEVAGIRAKFPNKIPVVVERYPRETFLLPDKTKFLV 60
sp|Q9GZQ8|MLP3B_HUMAN      -----MPSEKTFKQRRTFEQRVEDVRLIREQHPTKIPVIERYKGEKQLPVLDKTKFLV 54
sp|Q9H492|MLP3A_HUMAN      -----MPSDRPFKQRRSFADRCKEVQQIRDQHPSKIPVIERYKGEKQLPVLDKTKFLV 54
                               *:.: : * .: ** :.* :*:*:*: : * : **.*:*
sp|O95166|GBRAP_HUMAN      PSDLTVGQFYFLIRKRIHLRAEDALFFFVNNV-IPPTSATMGQLYQEHHEEDFFLYIAYS 110
sp|Q9BXW4|MLP3C_HUMAN      PQELTMTQFLSIIRSRMVLRAATEAFYLLVNNKSLVSMSATMAEIYRDYKDEDGFVYMTYA 120
sp|Q9GZQ8|MLP3B_HUMAN      PDHVNMSELIKIIRRRLQLNANQAFLLVNGHSMVSVSTPISEVYESEKDEDGFLYMYA 114
sp|Q9H492|MLP3A_HUMAN      PDHVNMSLVKIIRRRLQLNPTQAFLLVNQHSMVSVSTPIADIYEQEKDEDGFLYMYA 114
*...: : : ** *: * . :*:*:** : * : :*:*. : ** *:*:*:
sp|O95166|GBRAP_HUMAN      DESVYGL----- 117
sp|Q9BXW4|MLP3C_HUMAN      SQETFGCLESAAPRDGSSLEDRPCNPL 147
sp|Q9GZQ8|MLP3B_HUMAN      SQETFGMKLSV----- 125
sp|Q9H492|MLP3A_HUMAN      SQETFGF----- 121
.:...:*
```
