# Supplementary material for: The conformational and mutational landscape of the ubiquitin-like marker for the autophagosome formation in cancer
Source: bioRxiv or medRxiv preprint supplement (doi:10.1101/635284), 2019-05-14

2lue\_5S-E

A184D\_R37Q

REUs

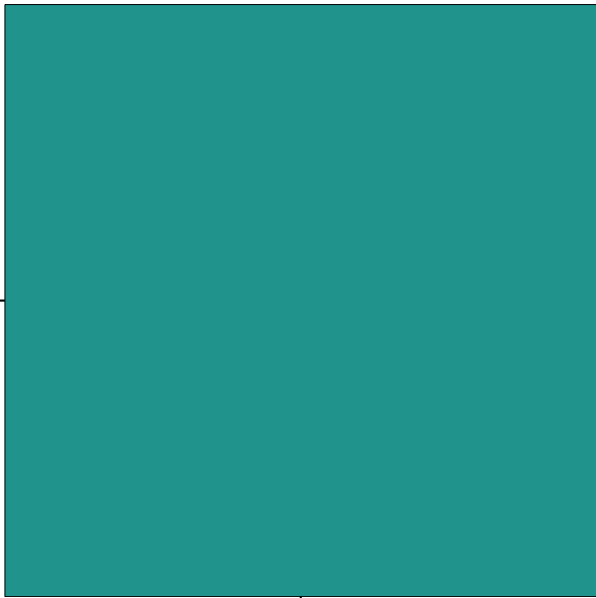

2

1

0

-1

-2

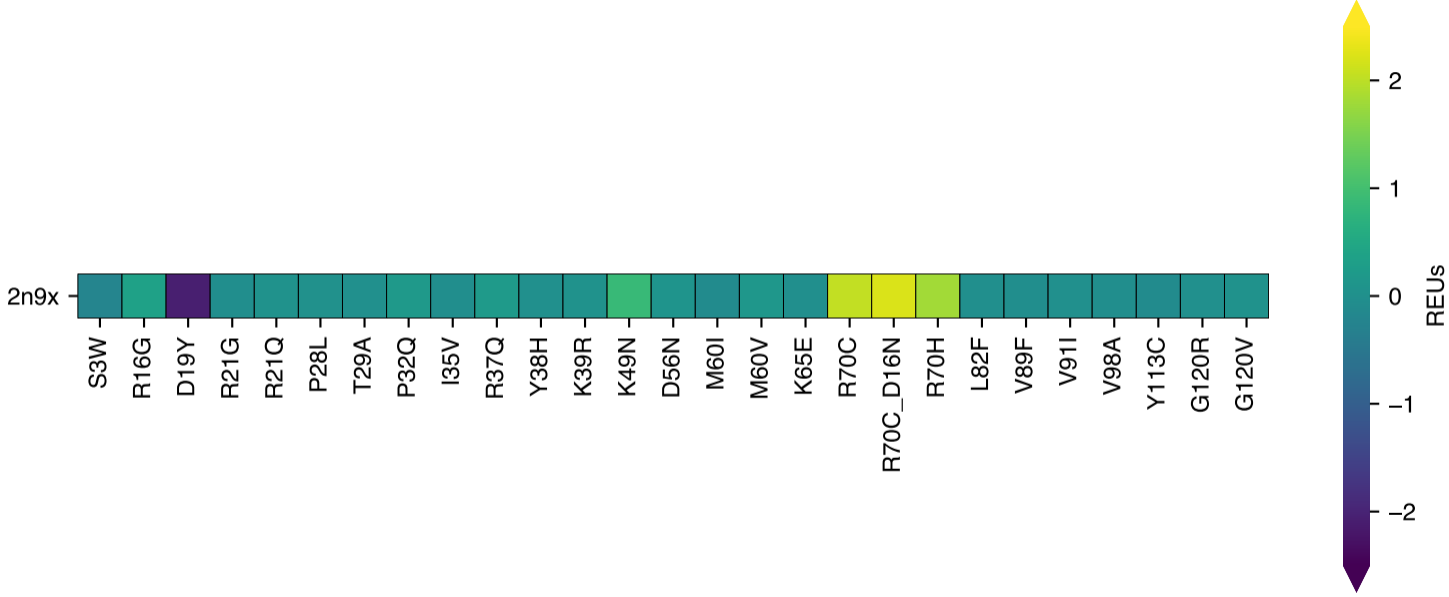

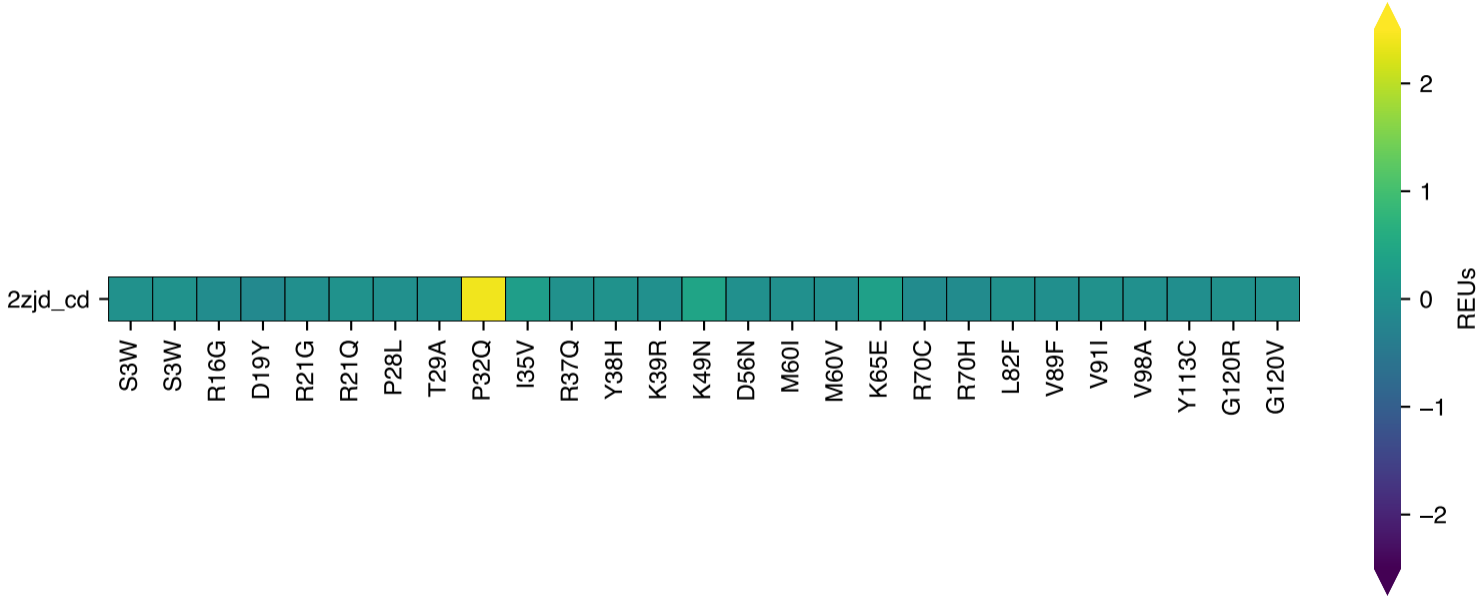

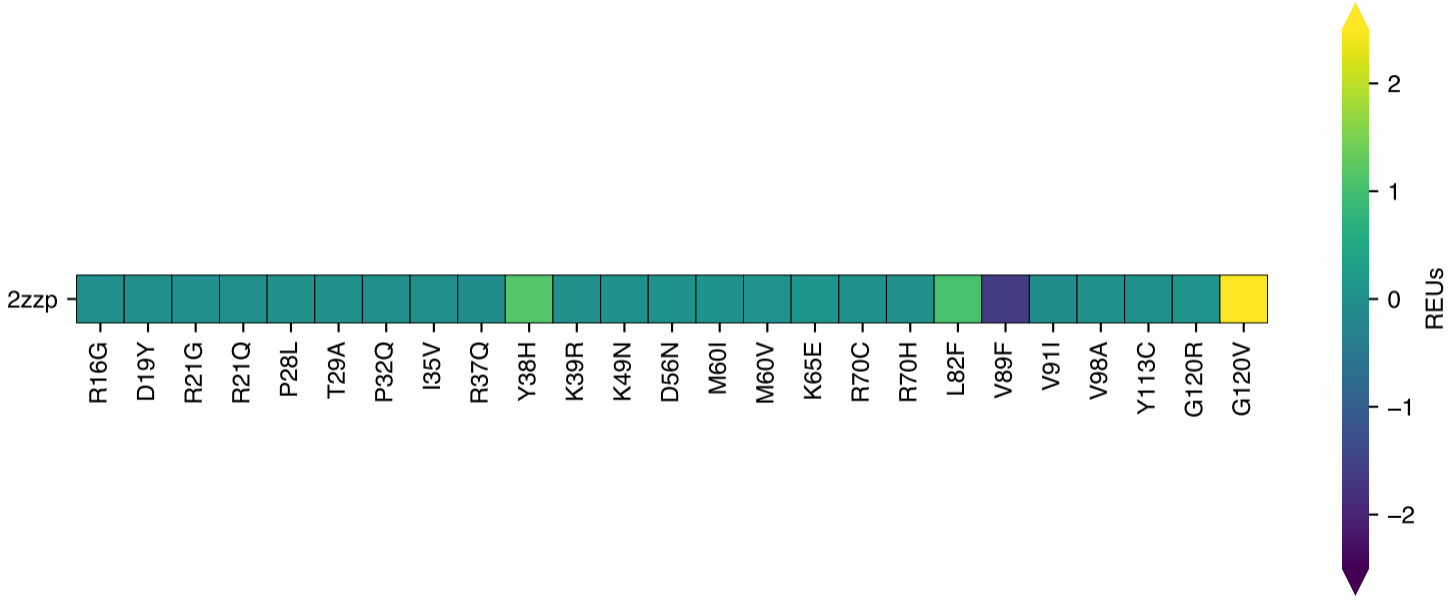

Supplement: Supplementary file [file media-10.pdf]
