# Supplementary material for: The conformational and mutational landscape of the ubiquitin-like marker for the autophagosome formation in cancer
Source: bioRxiv or medRxiv preprint supplement (doi:10.1101/635284), 2019-05-14

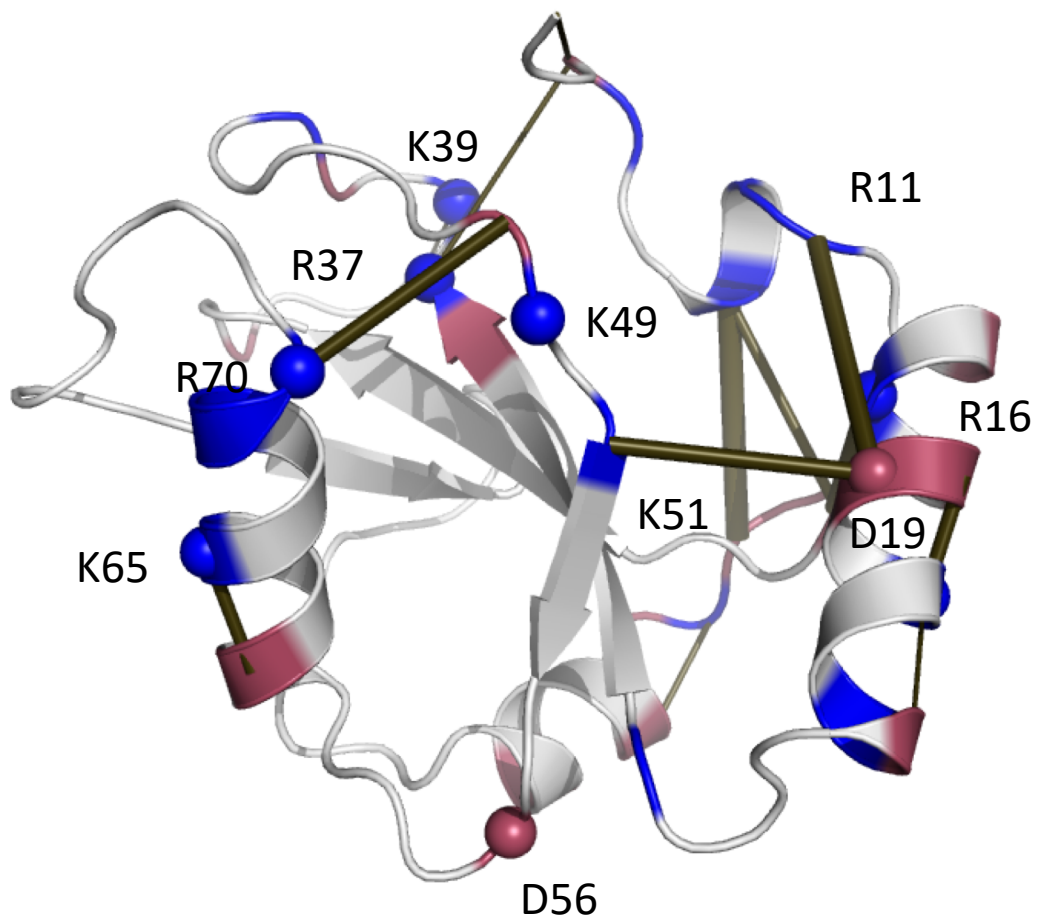

Supplement: Supplementary file [file media-11.pdf]
